# Supplementary material
Source: PubMed Central journal article supplement (PMC9632630)
Supplement: NIHMS1843093-supplement-Supplement.pdf [file NIHMS1843093-supplement-Supplement.pdf]

Analyses for FEV<sub>1</sub> in the UK Biobank (ukb-b-19657) with different exposures: ever/never smoking status (ukb-b-20261) in the UK biobank, ever stopped smoking for 6+ months (ukb-b-11355) in the UK biobank, and cigarettes per day (ieu-b-25) from Lui et al. 2019 (PMID 30643251). Based on the tutorial from [https://explodecomputer.github.io/steiger\\_collider/lutz\\_reanalysis.nb.html](https://explodecomputer.github.io/steiger_collider/lutz_reanalysis.nb.html)

```
suppressMessages(suppressPackageStartupMessages(suppressWarnings({
  library(TwoSampleMR)
  library(ieugwasr)
  library(tidyverse)
  library(knitr)
})))
knitr::opts_chunk$set(warning = FALSE)
```

## Analysis for FEV<sub>1</sub> (ukb-b-19657) and ever/never smoking status (ukb-b-20261) in the UK biobank

```
# UK biobank FEV1 (ukb-b-19657) using public GWAS summary data

gwasinfo("ukb-b-19657") %>% str()
```

```
## Classes 'GwasInfo' and 'data.frame': 1 obs. of 18 variables:
## $ id : chr "ukb-b-19657"
## $ trait : chr "Forced expiratory volume in 1-second (FEV1)"
## $ sex : chr "Males and Females"
## $ mr : int 1
## $ ontology : logi NA
## $ build : chr "HG19/GRCh37"
## $ category : chr "Continuous"
## $ note : chr "3063: Output from GWAS pipeline using Phesant derived variables from UKBioba
nk"
## $ group_name : chr "public"
## $ population : chr "European"
## $ unit : chr "SD"
## $ nsnp : int 9851867
## $ subcategory: logi NA
## $ consortium : chr "MRC-IEU"
## $ author : chr "Ben Elsworth"
## $ priority : int 1
## $ year : int 2018
## $ sample_size: int 421986
```

```
# Never / ever smoking status (ukb-b-20261) in the UK biobank

gwasinfo("ukb-b-20261") %>% str()
```

```
## Classes 'GwasInfo' and 'data.frame': 1 obs. of 20 variables:
## $ id : chr "ukb-b-20261"
## $ trait : chr "Ever smoked"
## $ sex : chr "Males and Females"
## $ mr : int 1
## $ ontology : logi NA
## $ build : chr "HG19/GRCh37"
## $ category : chr "Binary"
## $ note : chr "20160: Output from GWAS pipeline using Phesant derived variables from UKBiobank"
## $ group_name : chr "public"
## $ population : chr "European"
## $ unit : chr "SD"
## $ nsnp : int 9851867
## $ ncontrol : int 180558
## $ subcategory: logi NA
## $ consortium : chr "MRC-IEU"
## $ author : chr "Ben Elsworth"
## $ priority : int 1
## $ ncase : int 280508
## $ year : int 2018
## $ sample_size: int 461066
```

```
lutz_rs <- c("rs56113850", "rs12461383", "rs7260329", "rs11858836", "rs72738786", "rs11633958", "rs8192482", "rs2869548")
```

```
e0a <- extract_outcome_data(lutz_rs, "ukb-b-20261")
```

```
## Extracting data for 8 SNP(s) from 1 GWAS(s)
```

```
e0 <- convert_outcome_to_exposure(e0a)
o0 <- extract_outcome_data(lutz_rs, "ukb-b-19657")
```

```
## Extracting data for 8 SNP(s) from 1 GWAS(s)
```

```
d0 <- harmonise_data(e0, o0)
```

```
## Harmonising Ever smoked || id:ukb-b-20261 (ukb-b-20261) and Forced expiratory volume in 1-second (FEV1) || id:ukb-b-19657 (ukb-b-19657)
```

```
## Removing the following SNPs for being palindromic with intermediate allele frequencies:
## rs12461383
```

```
d0 <- add_metadata(d0)
d0 <- add_rsq(d0)
res0 <- mr(d0)
```

```
## Analysing 'ukb-b-20261' on 'ukb-b-19657'
```

```
kable(res0)
```

| id.exposure | id.outcome  | outcome                                                       | exposure                      | method                    | nsnp | b        | se        | pval      |
|-------------|-------------|---------------------------------------------------------------|-------------------------------|---------------------------|------|----------|-----------|-----------|
| ukb-b-20261 | ukb-b-19657 | Forced expiratory volume in 1-second (FEV1)    id:ukb-b-19657 | Ever smoked    id:ukb-b-20261 | MR Egger                  | 7    | 5.299823 | 1.4688006 | 0.0154085 |
| ukb-b-20261 | ukb-b-19657 | Forced expiratory volume in 1-second (FEV1)    id:ukb-b-19657 | Ever smoked    id:ukb-b-20261 | Weighted median           | 7    | 2.724055 | 0.4784397 | 0.0000000 |
| ukb-b-20261 | ukb-b-19657 | Forced expiratory volume in 1-second (FEV1)    id:ukb-b-19657 | Ever smoked    id:ukb-b-20261 | Inverse variance weighted | 7    | 2.454684 | 0.6600971 | 0.0002003 |
| ukb-b-20261 | ukb-b-19657 | Forced expiratory volume in 1-second (FEV1)    id:ukb-b-19657 | Ever smoked    id:ukb-b-20261 | Simple mode               | 7    | 2.798306 | 0.4781745 | 0.0010991 |
| ukb-b-20261 | ukb-b-19657 | Forced expiratory volume in 1-second (FEV1)    id:ukb-b-19657 | Ever smoked    id:ukb-b-20261 | Weighted mode             | 7    | 2.777025 | 0.4648569 | 0.0009868 |

```
s0 <- directionality_test(d0)
```

```
## r.exposure and/or r.outcome not present.
```

```
## Calculating approximate SNP-exposure and/or SNP-outcome correlations, assuming all are quantitative traits. Please pre-calculate r.exposure and/or r.outcome using get_r_from_lor() for any binary traits
```

```
str(s0)
```

```
## 'data.frame': 1 obs. of 8 variables:
## $ id.exposure : chr "ukb-b-20261"
## $ id.outcome : chr "ukb-b-19657"
## $ exposure : chr "Ever smoked || id:ukb-b-20261"
## $ outcome : chr "Forced expiratory volume in 1-second (FEV1) || id:ukb-b-19657"
## $ snp_r2.exposure : num 0.000166
## $ snp_r2.outcome : num 0.000515
## $ correct_causal_direction: logi FALSE
## $ steiger_pval : num 4.23e-06
```

```
# Steiger filtering
d0 <- steiger_filtering(d0)

a0 <- d0 %>%
  select(SNP, chr, pos, pval.exposure, rsq.exposure, rsq.outcome, steiger_dir, steiger_pval) %>%
  arrange(chr, pos)
b0 <- mr_singlesnp(d0) %>% select(SNP, b, se)
a0 <- inner_join(b0, a0, by="SNP")
kable(a0)
```

| SNP        | b        | se        | chr | pos      | pval.exposure | rsq.exposure | rsq.outcome | steiger_dir | steiger_pval |
|------------|----------|-----------|-----|----------|---------------|--------------|-------------|-------------|--------------|
| rs11633958 | 2.775228 | 0.4367444 | 15  | 78862064 | 0.0000750     | 7.9e-06      | 6.11e-05    | FALSE       | 0.0189743    |

| SNP        | b         | se        | chr | pos      | pval.exposure | rsq.exposure | rsq.outcome | steiger_dir | steiger_pval |
|------------|-----------|-----------|-----|----------|---------------|--------------|-------------|-------------|--------------|
| rs11858836 | 3.555632  | 0.6117479 | 15  | 78783277 | 0.0047000     | 4.0e-06      | 5.04e-05    | FALSE       | 0.0166257    |
| rs2869548  | 2.654238  | 0.4644784 | 15  | 78922638 | 0.0002000     | 7.0e-06      | 4.96e-05    | FALSE       | 0.0394252    |
| rs56113850 | -3.280212 | 0.8038733 | 19  | 41353107 | 0.0309999     | 2.3e-06      | 2.51e-05    | FALSE       | 0.1019237    |
| rs7260329  | -5.173358 | 2.8715050 | 19  | 41521638 | 0.5500000     | 2.0e-07      | 4.90e-06    | FALSE       | 0.4017562    |
| rs72738786 | 3.074158  | 0.4505859 | 15  | 78828086 | 0.0001200     | 7.4e-06      | 7.03e-05    | FALSE       | 0.0079469    |
| rs8192482  | 2.678632  | 0.4317747 | 15  | 78886198 | 0.0000620     | 8.1e-06      | 5.81e-05    | FALSE       | 0.0249880    |

## Analysis for FEV<sub>1</sub> (ukb-b-19657) and ever stopped smoking for 6+ months (ukb-b-11355) in the UK biobank

```
# Ever stopped smoking for 6+ months (ukb-b-11355)
```

```
gwasinfo("ukb-b-11355") %>% str()
```

```
## Classes 'GwasInfo' and 'data.frame': 1 obs. of 20 variables:
## $ id : chr "ukb-b-11355"
## $ trait : chr "Ever stopped smoking for 6+ months"
## $ sex : chr "Males and Females"
## $ mr : int 1
## $ ontology : logi NA
## $ build : chr "HG19/GRCh37"
## $ category : chr "Binary"
## $ note : chr "2907: Output from GWAS pipeline using Phesant derived variables from UKBiobank"
## $ group_name : chr "public"
## $ population : chr "European"
## $ unit : chr "SD"
## $ nsnp : int 9851867
## $ ncontrol : int 64249
## $ subcategory: logi NA
## $ consortium : chr "MRC-IEU"
## $ author : chr "Ben Elsworth"
## $ priority : int 1
## $ ncase : int 48981
## $ year : int 2018
## $ sample_size: int 113230
```

```
e3a <- extract_outcome_data(lutz_rs, "ukb-b-11355")
```

```
## Extracting data for 8 SNP(s) from 1 GWAS(s)
```

```
e3 <- convert_outcome_to_exposure(e3a)
o3 <- extract_outcome_data(lutz_rs, "ukb-b-19657")
```

```
## Extracting data for 8 SNP(s) from 1 GWAS(s)
```

```
d3 <- harmonise_data(e3, o3)
```

```
## Harmonising Ever stopped smoking for 6+ months || id:ukb-b-11355 (ukb-b-11355) and Forced expiratory volume in 1-second (FEV1) || id:ukb-b-19657 (ukb-b-19657)
```

```
## Removing the following SNPs for being palindromic with intermediate allele frequencies:  
## rs12461383
```

```
d3 <- add_metadata(d3)  
d3 <- add_rsq(d3)  
res3 <- mr(d3)
```

```
## Analysing 'ukb-b-11355' on 'ukb-b-19657'
```

```
kable(res3)
```

| id.exposure | id.outcome  | outcome                                                       | exposure                                             | method                    | nsnp | b         | se        | pval      |
|-------------|-------------|---------------------------------------------------------------|------------------------------------------------------|---------------------------|------|-----------|-----------|-----------|
| ukb-b-11355 | ukb-b-19657 | Forced expiratory volume in 1-second (FEV1)    id:ukb-b-19657 | Ever stopped smoking for 6+ months    id:ukb-b-11355 | MR Egger                  | 7    | 1.9204109 | 0.3314394 | 0.0021571 |
| ukb-b-11355 | ukb-b-19657 | Forced expiratory volume in 1-second (FEV1)    id:ukb-b-19657 | Ever stopped smoking for 6+ months    id:ukb-b-11355 | Weighted median           | 7    | 0.9535886 | 0.1274894 | 0.0000000 |
| ukb-b-11355 | ukb-b-19657 | Forced expiratory volume in 1-second (FEV1)    id:ukb-b-19657 | Ever stopped smoking for 6+ months    id:ukb-b-11355 | Inverse variance weighted | 7    | 0.8380467 | 0.2039978 | 0.0000399 |
| ukb-b-11355 | ukb-b-19657 | Forced expiratory volume in 1-second (FEV1)    id:ukb-b-19657 | Ever stopped smoking for 6+ months    id:ukb-b-11355 | Simple mode               | 7    | 0.9620765 | 0.1222313 | 0.0002227 |
| ukb-b-11355 | ukb-b-19657 | Forced expiratory volume in 1-second (FEV1)    id:ukb-b-19657 | Ever stopped smoking for 6+ months    id:ukb-b-11355 | Weighted mode             | 7    | 0.9566156 | 0.1217473 | 0.0002248 |

```
s3 <- directionality_test(d3)
```

```
## r.exposure and/or r.outcome not present.
```

```
## Calculating approximate SNP-exposure and/or SNP-outcome correlations, assuming all are quantitative traits. Please pre-calculate r.exposure and/or r.outcome using get_r_from_lor() for any binary traits
```

```
str(s3)
```

```
## 'data.frame': 1 obs. of 8 variables:
## $ id.exposure : chr "ukb-b-11355"
## $ id.outcome : chr "ukb-b-19657"
## $ exposure : chr "Ever stopped smoking for 6+ months || id:ukb-b-11355"
## $ outcome : chr "Forced expiratory volume in 1-second (FEV1) || id:ukb-b-19657"
## $ snp_r2.exposure : num 0.00144
## $ snp_r2.outcome : num 0.000515
## $ correct_causal_direction: logi TRUE
## $ steiger_pval : num 5.15e-06
```

```
# Steiger filtering
d3 <- steiger_filtering(d3)

a3 <- d3 %>%
  select(SNP, chr, pos, pval.exposure, rsq.exposure, rsq.outcome, steiger_dir, steiger_pval) %>%
  arrange(chr, pos)
b3 <- mr_singlesnp(d3) %>% select(SNP, b, se)
a3 <- inner_join(b3, a3, by="SNP")
kable(a3)
```

| SNP        | b          | se        | chr | pos      | pval.exposure | rsq.exposure | rsq.outcome | steiger_dir | steiger_pval |
|------------|------------|-----------|-----|----------|---------------|--------------|-------------|-------------|--------------|
| rs11633958 | 0.9594136  | 0.1509853 | 15  | 78862064 | 0.0000000     | 6.69e-05     | 6.11e-05    | TRUE        | 0.9131243    |
| rs11858836 | 0.9728156  | 0.1673733 | 15  | 78783277 | 0.0000005     | 5.38e-05     | 5.04e-05    | TRUE        | 0.9444722    |
| rs2869548  | 0.8823986  | 0.1544153 | 15  | 78922638 | 0.0000001     | 6.41e-05     | 4.96e-05    | TRUE        | 0.7729347    |
| rs56113850 | -1.3182090 | 0.3230502 | 19  | 41353107 | 0.0098001     | 1.44e-05     | 2.51e-05    | FALSE       | 0.7165944    |
| rs7260329  | -1.5037222 | 0.8346505 | 19  | 41521638 | 0.3200000     | 2.20e-06     | 4.90e-06    | FALSE       | 0.8239965    |
| rs72738786 | 1.0086821  | 0.1478447 | 15  | 78828086 | 0.0000000     | 6.96e-05     | 7.03e-05    | FALSE       | 0.9913019    |
| rs8192482  | 0.9336674  | 0.1504999 | 15  | 78886198 | 0.0000000     | 6.72e-05     | 5.81e-05    | TRUE        | 0.8634373    |

## Analysis for FEV<sub>1</sub> (ukb-b-19657) in the UK biobank and cigarettes per day (ieu-b-25) from Lui et al. 2019 (PMID 30643251)

```
# cigarettes per day (ieu-b-25) from Lui et al. 2019 (PMID 30643251)
gwasinfo("ieu-b-25") %>% str()
```

```
## Classes 'GwasInfo' and 'data.frame': 1 obs. of 19 variables:
## $ id : chr "ieu-b-25"
## $ trait : chr "Cigarettes per Day"
## $ sex : chr "Males and Females"
## $ mr : int 1
## $ ontology : logi NA
## $ build : chr "HG19/GRCh37"
## $ category : chr "Continuous"
## $ note : logi NA
## $ group_name : chr "public"
## $ population : chr "European"
## $ unit : logi NA
## $ nsnp : int 11913712
## $ subcategory: chr "Behavioural"
## $ consortium : chr "GWAS and Sequencing Consortium of Alcohol and Nicotine use"
## $ author : chr "Liu, M"
## $ priority : int 1
## $ year : int 2019
## $ sample_size: int 337334
## $ pmid : int 30643251
```

```
ela <- extract_outcome_data(lutz_rs, "ieu-b-25")
```

```
## Extracting data for 8 SNP(s) from 1 GWAS(s)
```

```
e1 <- convert_outcome_to_exposure(ela)
o1 <- extract_outcome_data(lutz_rs, "ukb-b-19657")
```

```
## Extracting data for 8 SNP(s) from 1 GWAS(s)
```

```
d1 <- harmonise_data(e1, o1)
```

```
## Harmonising Cigarettes per Day || id:ieu-b-25 (ieu-b-25) and Forced expiratory volume in 1-second (FEV1) || id:ukb-b-19657 (ukb-b-19657)
```

```
## Removing the following SNPs for being palindromic with intermediate allele frequencies:
## rs12461383
```

```
d1 <- add_metadata(d1)
d1 <- add_rsq(d1)
res1 <- mr(d1)
```

```
## Analysing 'ieu-b-25' on 'ukb-b-19657'
```

```
kable(res1)
```

| id.exposure | id.outcome | outcome | exposure | method | nsnp | b | se | pval |
|-------------|------------|---------|----------|--------|------|---|----|------|
|-------------|------------|---------|----------|--------|------|---|----|------|

| id.exposure | id.outcome  | outcome                                                       | exposure                          | method                    | nsnp | b          | se        | pval      |
|-------------|-------------|---------------------------------------------------------------|-----------------------------------|---------------------------|------|------------|-----------|-----------|
| ieu-b-25    | ukb-b-19657 | Forced expiratory volume in 1-second (FEV1)    id:ukb-b-19657 | Cigarettes per Day    id:ieu-b-25 | MR Egger                  | 7    | -0.0627877 | 0.0148340 | 0.0082270 |
| ieu-b-25    | ukb-b-19657 | Forced expiratory volume in 1-second (FEV1)    id:ukb-b-19657 | Cigarettes per Day    id:ieu-b-25 | Weighted median           | 7    | -0.0659147 | 0.0055386 | 0.0000000 |
| ieu-b-25    | ukb-b-19657 | Forced expiratory volume in 1-second (FEV1)    id:ukb-b-19657 | Cigarettes per Day    id:ieu-b-25 | Inverse variance weighted | 7    | -0.0660318 | 0.0045409 | 0.0000000 |
| ieu-b-25    | ukb-b-19657 | Forced expiratory volume in 1-second (FEV1)    id:ukb-b-19657 | Cigarettes per Day    id:ieu-b-25 | Simple mode               | 7    | -0.0658609 | 0.0069561 | 0.0000790 |
| ieu-b-25    | ukb-b-19657 | Forced expiratory volume in 1-second (FEV1)    id:ukb-b-19657 | Cigarettes per Day    id:ieu-b-25 | Weighted mode             | 7    | -0.0653982 | 0.0067429 | 0.0000689 |

```
s1 <- directionality_test(d1)
```

```
## r.exposure and/or r.outcome not present.
```

```
## Calculating approximate SNP-exposure and/or SNP-outcome correlations, assuming all are quantitative traits. Please pre-calculate r.exposure and/or r.outcome using get_r_from_lor() for any binary traits
```

```
str(s1)
```

```
## 'data.frame': 1 obs. of 8 variables:
## $ id.exposure : chr "ieu-b-25"
## $ id.outcome : chr "ukb-b-19657"
## $ exposure : chr "Cigarettes per Day || id:ieu-b-25"
## $ outcome : chr "Forced expiratory volume in 1-second (FEV1) || id:ukb-b-19657"
## $ snp_r2.exposure : num 0.0146
## $ snp_r2.outcome : num 0.000515
## $ correct_causal_direction: logi TRUE
## $ steiger_pval : num 0
```



```

# Steiger filtering
d1 <- steiger_filtering(d1)

a1 <- d1 %>%
  select(SNP, chr, pos, pval.exposure, rsq.exposure, rsq.outcome, steiger_dir, steiger_pval) %>%
  arrange(chr, pos)
b1 <- mr_singlesnp(d1) %>% select(SNP, b, se)
a1 <- inner_join(b1, a1, by="SNP")
kable(a1)

```

| SNP        | b          | se        | chr | pos      | pval.exposure | rsq.exposure | rsq.outcome | steiger_dir | steiger_pval |
|------------|------------|-----------|-----|----------|---------------|--------------|-------------|-------------|--------------|
| rs11633958 | -0.0655063 | 0.0103089 | 15  | 78862064 | 0             | 0.0026992    | 6.11e-05    | TRUE        | 0.0e+00      |
| rs11858836 | -0.0669645 | 0.0115213 | 15  | 78783277 | 0             | 0.0021387    | 5.04e-05    | TRUE        | 0.0e+00      |
| rs2869548  | -0.0631335 | 0.0110480 | 15  | 78922638 | 0             | 0.0023807    | 4.96e-05    | TRUE        | 0.0e+00      |
| rs56113850 | -0.0669264 | 0.0164015 | 19  | 41353107 | 0             | 0.0010838    | 2.51e-05    | TRUE        | 0.0e+00      |
| rs7260329  | -0.0764538 | 0.0424362 | 19  | 41521638 | 0             | 0.0001630    | 4.90e-06    | TRUE        | 4.9e-06      |
| rs72738786 | -0.0693134 | 0.0101594 | 15  | 78828086 | 0             | 0.0027788    | 7.03e-05    | TRUE        | 0.0e+00      |
| rs8192482  | -0.0639848 | 0.0103139 | 15  | 78886198 | 0             | 0.0027051    | 5.81e-05    | TRUE        | 0.0e+00      |

## Analysis for FEV<sub>1</sub> (data code = 20150) and current/former smoking status (based on data code = 20116) in the UK biobank

In the UK biobank, we used the smoking status phenotype to identify current/former smoking status (data code=20116) and FEV<sub>1</sub> (best measure) (data code=20150) in participants with European ancestry, resulting in 160,183 participants. We considered the unadjusted FEV<sub>1</sub> as well as FEV<sub>1</sub> adjusted for age, sex and genetic ancestry via 10 PCs. Below is the correlation matrix: corGX is the correlation between the SNP and current/former smoking status, corGY is the correlation between the SNP and FEV<sub>1</sub>, and corXY is the correlation between current/former smoking status and FEV<sub>1</sub>. As recommended by the TwoSampleMR package, for the binary current/former smoking status phenotype, we calculated the corGX using the get\_r\_from\_lor function from the TwoSampleMR package. (Lee et al. A Better Coefficient of Determination for Genetic Profile Analysis. Genetic Epidemiology 36: 214–224 (2012))

```
library(psych)
```

```
##
## Attaching package: 'psych'
```

```
## The following objects are masked from 'package:ggplot2':
##
##   %+%, alpha
```

```

# Correlations
dataSmk<-matrix(c(160183,160183,160183,160183,160183,160183,160183,0.004,-0.024,0.005,0.004,0.009,0.004,0.005,-0.02,-0.01,-0.02,-0.02,0.01,-0.02,-0.02,-0.03,-0.03,-0.03,-0.03,-0.03,-0.03),nrow=7,ncol=4)
rownames(dataSmk)<-c("rs11858836_A","rs56113850_C","rs11633958_T","rs2869548_A","rs7260329_A","rs72738786_T","rs8192482_T")
colnames(dataSmk)<-c("n","corGX","corGY","corXY")
dataSmk

```

```
##           n corGX corGY corXY
## rs11858836_A 160183 0.004 -0.02 -0.03
## rs56113850_C 160183 -0.024 -0.01 -0.03
## rs11633958_T 160183 0.005 -0.02 -0.03
## rs2869548_A 160183 0.004 -0.02 -0.03
## rs7260329_A 160183 0.009 0.01 -0.03
## rs72738786_T 160183 0.004 -0.02 -0.03
## rs8192482_T 160183 0.005 -0.02 -0.03
```

```
# Matrix to store results
nSNP<-nrow(dataSmk)
matS<-matrix(0,nrow=(nSNP),ncol=2)
colnames(matS)<-c("Direction","SteigerP")
rownames(matS)<-rownames(dataSmk)

#cycle through SNPs
for(ss in 1:nSNP){

# William test of correlation from the Steiger paper (1980) for dependent samples.
matS[ss,"SteigerP"]<-signif(r.test(dataSmk[ss,"n"], r12 = dataSmk[ss,"corGX"], r13=dataSmk[ss,"corG
Y"], r23=dataSmk[ss,"corXY"], twotailed = TRUE)$p,1)

matS[ss,"Direction"]<-paste(((dataSmk[ss,"corGX"])^2>(r13=dataSmk[ss,"corGY"])^2))
}

matS
```

```
##           Direction SteigerP
## rs11858836_A "FALSE" "2e-11"
## rs56113850_C "TRUE" "9e-05"
## rs11633958_T "FALSE" "3e-12"
## rs2869548_A "FALSE" "2e-11"
## rs7260329_A "FALSE" "0.8"
## rs72738786_T "FALSE" "2e-11"
## rs8192482_T "FALSE" "3e-12"
```

Note that the `Steiger_filtering` function from `TwoSampleMR` package uses the William test of correlation from the Steiger paper (1980) for independent samples. Given that both phenotypes are from the same overlapping sample in the UK Biobank, the William test of correlation from the Steiger paper (1980) for dependent samples needs to be used here. For this specific example, the Steiger p-values were similar for the 2 formulas.

Below is the `mr_steiger` function from <https://github.com/MRCIEU/TwoSampleMR/blob/master/R/steiger.R> on Feb 1, 2022. Note that the correlation for the exposure and the outcome is the square root of the sum of the absolute values of all the correlations.

```
r_exp <- sqrt(sum(r_exp[!is.na(r_exp) | is.na(r_out)]^2))
r_out <- sqrt(sum(r_out[!is.na(r_exp) | is.na(r_out)]^2))
```

```

mr_steiger <- function(p_exp, p_out, n_exp, n_out, r_exp, r_out, r_xxo = 1, r_yyo=1, ...)
{
  requireNamespace("psych", quietly=TRUE)

  r_exp <- abs(r_exp)
  r_out <- abs(r_out)

  ir_exp <- is.na(r_exp)
  ir_out <- is.na(r_out)

  ip_exp <- is.na(p_exp) | is.na(n_exp)
  ip_out <- is.na(p_out) | is.na(n_out)

  if(any(ir_exp))
  {
    r_exp[ir_exp] <- get_r_from_pn(p_exp[ir_exp & !ip_exp], n_exp[ir_exp & !ip_exp])
  }

  if(any(ir_out))
  {
    r_out[ir_out] <- get_r_from_pn(p_out[ir_out & !ip_out], n_out[ir_out & !ip_out])
  }

  r_exp <- sqrt(sum(r_exp[!is.na(r_exp) | is.na(r_out)]^2))
  r_out <- sqrt(sum(r_out[!is.na(r_exp) | is.na(r_out)]^2))

  stopifnot(r_xxo <= 1 & r_xxo >= 0)
  stopifnot(r_yyo <= 1 & r_yyo >= 0)

  r_exp_adj <- sqrt(r_exp^2 / r_xxo^2)
  r_out_adj <- sqrt(r_out^2 / r_yyo^2)

  sensitivity <- steiger_sensitivity(r_exp, r_out, ...)

  rtest <- psych::r.test(n = mean(n_exp), n2 = mean(n_out), r12 = r_exp, r34 = r_out)

  rtest_adj <- psych::r.test(n = mean(n_exp), n2 = mean(n_out), r12 = r_exp_adj, r34 = r_out_adj)

  l <- list(
    r2_exp = r_exp^2,
    r2_out = r_out^2,
    r2_exp_adj = r_exp_adj^2,
    r2_out_adj = r_out_adj^2,
    correct_causal_direction = r_exp > r_out,
    steiger_test = pnorm(-abs(rtest[["z"]])) * 2,
    correct_causal_direction_adj = r_exp_adj > r_out_adj,
    steiger_test_adj = pnorm(-abs(rtest_adj[["z"]])) * 2,
    vz = sensitivity$zvz,
    vz0 = sensitivity$zvz0,
    vz1 = sensitivity$zvz1,
    sensitivity_ratio = sensitivity$sensitivity_ratio,
    sensitivity_plot = sensitivity$pl
  )
  return(l)
}

```
